# Supplementary material for: Chiral induction in a pcu-derived network from achiral precursors
Source: Royal Society of Chemistry journal article supplement (doi:10.1039/c9cc00692c), 2019-01-01
Supplement: c9cc00692c1.pdf [file c9cc00692c1.pdf]

## Supporting information

### Materials and Methods:

All chemicals were reagent grade and used as purchased without further purification. Elemental analysis for C, H and N was carried out on a German Elementar Vario EL III instrument. Thermogravimetric analyses was recorded on a NETZSCH STA 449C unit at a heating rate of 10 °C·min<sup>-1</sup> under nitrogen atmosphere. The power X-ray diffractometer using Cu K $\alpha$  radiation ( $\lambda = 0.154$  nm).

### Synthesis of compound FJI-H20

Compound **FJI-H20**  $\{[\text{Zn}_4\text{O}(\text{DPOT})](\text{H}_2\text{O})_2(\text{DEF})_4\}_n$  was obtained by dissolving  $\text{Zn}(\text{NO}_3)_2$  (0.03mmol, 9mg) and  $\text{H}_6\text{DPOT}$  (0.015mmol, 9 mg) in DEF/ $\text{H}_2\text{O}$  ( $v_1:v_2 = 2:1$ ), and heating this solution at 85°C for three days, then the colourless crystal obtained in 85% yield. Anal. calcd for  $\text{C}_{47}\text{H}_{57}\text{Zn}_4\text{N}_7\text{O}_{22}$  (Mr = 1333.63): C, 42.33; H, 4.31; N, 7.35. Found: C, 42.54; H, 4.51; N, 7.53.

### Gas adsorption Analysis

$\text{N}_2$ ,  $\text{H}_2$ , and  $\text{CO}_2$  isotherms for **FJI-H20** were determined using an Accelerated Surface Area and Porosimetry 2020-M System at the Fujian Institute of Research on the Structure of Matter in a clean ultra- high vacuum system. Before measurements, about 100 mg solvent-exchanged samples were loaded into the sample basket within the adsorption instrument and then degassed under dynamic vacuum at 100 °C for 10 h to obtain the fully desolvated samples.

### Single Crystal X-ray crystallography

Data collections were all performed on a SuperNova diffractometer with graphite mono chromated CuK $\alpha$  radiation ( $\lambda = 0.71073 \text{ \AA}$ ). The structure was solved by direct methods, and all calculations were performed using the SHELXL package<sup>1</sup>. The structure of **FJI-H20** was refined by full matrix least-squares with anisotropic displacement parameters for non-hydrogen atoms. All hydrogen atoms were generated geometrically and treated as riding. The crystallographic data are summarized in Table S1-S2. CCDC 1880645-6 contains the supplementary crystallographic data for compound **FJI-H20** and its mirror. These data can be obtained free of charge from The Cambridge Crystallographic Data Centre via [www.ccdc.cam.ac.uk/data\\_request/cif](http://www.ccdc.cam.ac.uk/data_request/cif).

(1) G. M. Sheldrick, SHELXL-97, Program for Crystal Structure Refinement, University of Göttingen, **1997**.

**Table S1** Crystal data and refinement results for compound **FJI-H20** and its mirror.

|                | <b>FJI-H20</b>                                                                 | <b>FJI-H20-mirror</b>                                                          |
|----------------|--------------------------------------------------------------------------------|--------------------------------------------------------------------------------|
| Formula        | C <sub>47</sub> H <sub>57</sub> Zn <sub>4</sub> N <sub>7</sub> O <sub>22</sub> | C <sub>47</sub> H <sub>57</sub> Zn <sub>4</sub> N <sub>7</sub> O <sub>22</sub> |
| Formula weight | 1333.63                                                                        | 1333.63                                                                        |
| Crystal system | cubic                                                                          | cubic                                                                          |
| space group    | <i>P2</i> <sub>1</sub> <i>3</i>                                                | <i>P2</i> <sub>1</sub> <i>3</i>                                                |
| a (Å)          | 18.1601(3)                                                                     | 18.1710(2)                                                                     |
| b (Å)          | 18.1601(3)                                                                     | 18.1710(2)                                                                     |
| c (Å)          | 18.1601(3)                                                                     | 18.1710(2)                                                                     |
| $\alpha$ (°)   | 90                                                                             | 90                                                                             |
| $\beta$ (°)    | 90                                                                             | 90                                                                             |
| $\gamma$ (°)   | 90                                                                             | 90                                                                             |

|                          |           |           |
|--------------------------|-----------|-----------|
| Volume (Å <sup>3</sup> ) | 5989.0(3) | 5999.8(2) |
| T (K)                    | 150       | 150       |
| Z                        | 4         | 4         |
| F (000)                  | 1760.0    | 1760.0    |
| R1 (I>2σ(I))             | 0.0449    | 0.0376    |
| wR2 (I>2σ(I))            | 0.1223    | 0.1053    |
| Goodness of fit on F2    | 1.018     | 1.061     |

**Table S2** Selected Bond Lengths (Å) and Angle (°) for compound **FJI-H20** and its mirror.

| <b>FJI-H20</b>                          |            | <b>FJI-H20-mirror</b>                   |           |
|-----------------------------------------|------------|-----------------------------------------|-----------|
| Bond                                    | (Å)        | Bond                                    | (Å)       |
| Zn2—O5 <sup>i</sup>                     | 1.972 (4)  | Zn2—O5 <sup>i</sup>                     | 1.965 (3) |
| Zn2—O1                                  | 1.930 (2)  | Zn2—O1                                  | 1.932 (2) |
| Zn2—O4 <sup>ii</sup>                    | 1.979 (4)  | Zn2—O4 <sup>ii</sup>                    | 1.987 (4) |
| Zn2—O3                                  | 1.965 (5)  | Zn2—O3                                  | 1.957 (4) |
| Zn1—O1                                  | 2.034 (7)  | Zn1—O1                                  | 2.013 (5) |
| Zn1—O2 <sup>iii</sup>                   | 1.892 (11) | Zn1—O2 <sup>iii</sup>                   | 1.851 (8) |
| Zn1—O2 <sup>iv</sup>                    | 1.892 (11) | Zn1—O2 <sup>iv</sup>                    | 1.851 (8) |
| Zn1—O2                                  | 1.892 (11) | Zn1—O2                                  | 1.851 (8) |
| Angle                                   | (°)        | Angle                                   | (°)       |
| O5 <sup>i</sup> —Zn2—O3                 | 111.7 (2)  | O5 <sup>i</sup> —Zn2—O3                 | 111.8 (2) |
| O1—Zn2—O5 <sup>i</sup>                  | 111.3 (2)  | O1—Zn2—O5 <sup>i</sup>                  | 111.5 (2) |
| O1—Zn2—O4 <sup>ii</sup>                 | 109.6 (2)  | O1—Zn2—O4 <sup>ii</sup>                 | 109.8(2)  |
| O1—Zn2—O3                               | 118.9 (2)  | O1—Zn2—O3                               | 118.7(2)  |
| O4 <sup>ii</sup> —Zn2—O5 <sup>i</sup>   | 99.1 (2)   | O4 <sup>ii</sup> —Zn2—O5 <sup>i</sup>   | 98.9 (2)  |
| O4 <sup>ii</sup> —Zn2—O3                | 104.1 (2)  | O4 <sup>ii</sup> —Zn2—O3                | 104.0 (2) |
| O2 <sup>iv</sup> —Zn1—O1                | 102.6 (4)  | O2 <sup>iv</sup> —Zn1—O1                | 103.1 (3) |
| O2 <sup>iii</sup> —Zn1—O1               | 102.6 (4)  | O2 <sup>iii</sup> —Zn1—O1               | 103.1 (3) |
| O2—Zn1—O1                               | 102.6 (4)  | O2—Zn1—O1                               | 103.1 (3) |
| O2 <sup>iii</sup> —Zn1—O2 <sup>iv</sup> | 115.4 (3)  | O2 <sup>iii</sup> —Zn1—O2 <sup>iv</sup> | 115.0 (2) |
| O2 <sup>iv</sup> —Zn1—O2                | 115.4 (3)  | O2 <sup>iv</sup> —Zn1—O2                | 115.0 (2) |
| O2 <sup>iii</sup> —Zn1—O2               | 115.4 (3)  | O2 <sup>iii</sup> —Zn1—O2               | 115.0 (2) |

Symmetry codes : <sup>i</sup>1/2+X,1/2-Y,-Z; <sup>ii</sup>-Z,1/2+X,1/2-Y; <sup>iii</sup>Y,Z,X; <sup>iv</sup>Z,X,Y

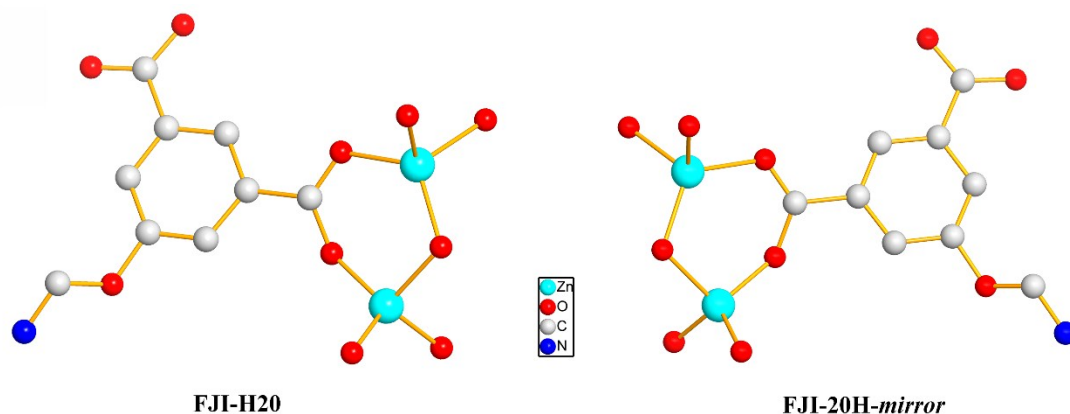

**Figure S1** asymmetric unit of **FJI-H20** and **FJI-20H-mirror**.

**Table S3** Refined structure data of ten randomly selected **FJI-H20** crystals with absolute configuration and flack parameter

|            | a (Å)       | R1     | wR2    | Flack parameter |
|------------|-------------|--------|--------|-----------------|
| Crystal-1  | 18.1925(6)  | 0.0449 | 0.1210 | -0.02(4)        |
| Crystal-2  | 18.2179(2)  | 0.0444 | 0.1274 | 0.08(4)         |
| Crystal-3  | 18.2201(7)  | 0.0818 | 0.2369 | 0.95(3)         |
| Crystal-4  | 18.1914(3)  | 0.0429 | 0.1087 | 0.94(6)         |
| Crystal-5  | 18.2236(5)  | 0.0537 | 0.1335 | 0.04(7)         |
| Crystal-6  | 18.2004(10) | 0.0452 | 0.1072 | 0.05(6)         |
| Crystal-7  | 18.2072(5)  | 0.0480 | 0.1336 | 0.08(4)         |
| Crystal-8  | 18.1766(6)  | 0.0463 | 0.1124 | 0.04(7)         |
| Crystal-9  | 18.2326(12) | 0.0535 | 0.1416 | 0.01(8)         |
| Crystal-10 | 18.2444(3)  | 0.0443 | 0.1255 | 0.06(4)         |

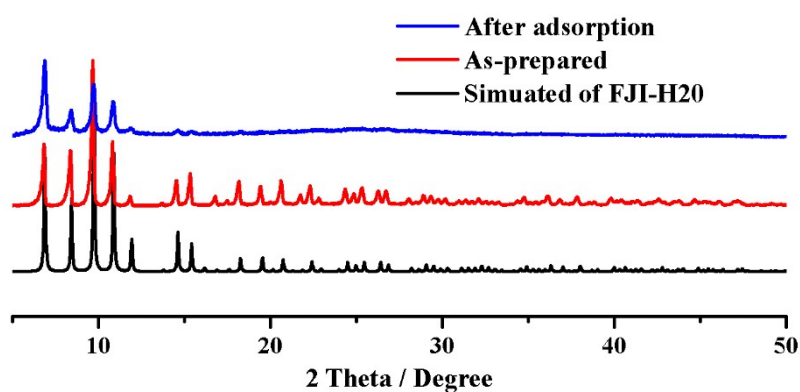

**Figure S2** Powder X-ray diffraction Analyses of **FJI-H20** for adsorption.

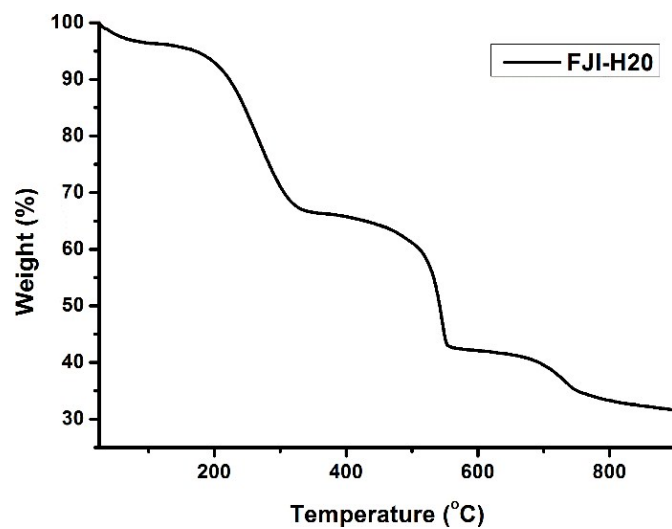

Figure S3 TGA curves of compound FJI-H20.

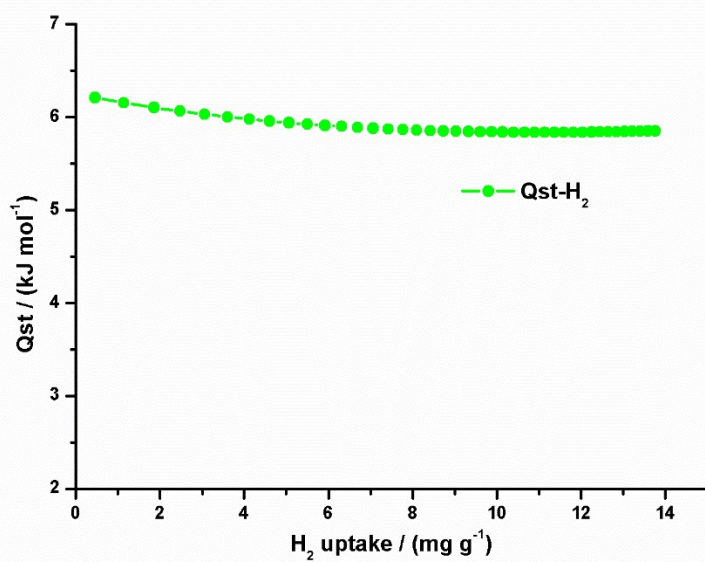

Figure S4 Adsorption heat of H<sub>2</sub> of FJI-H20.

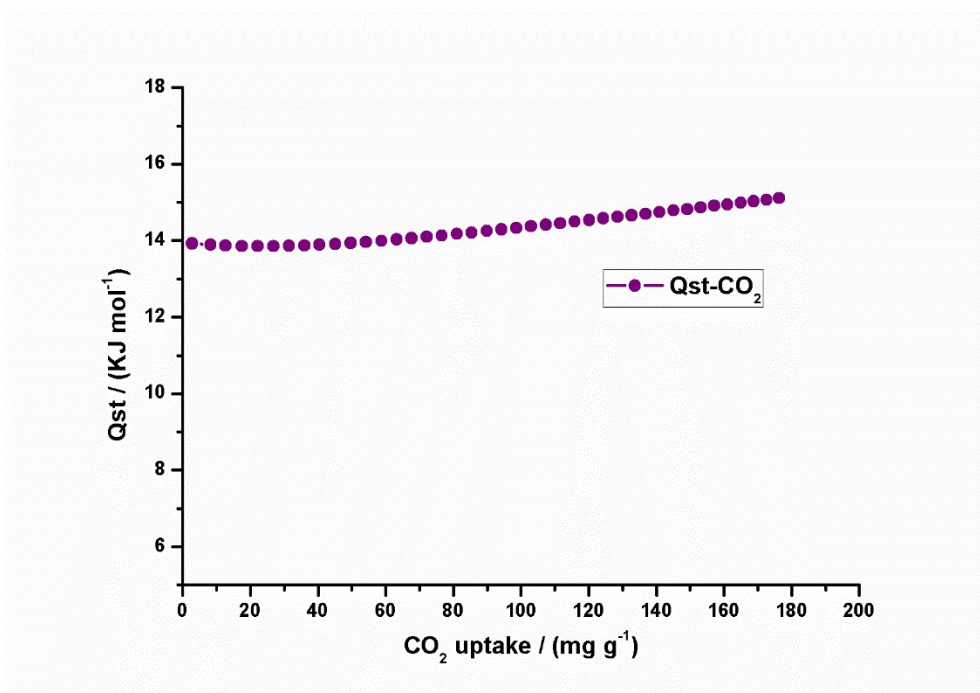

**Figure S5** Adsorption heat of CO<sub>2</sub> of FJI-H20.

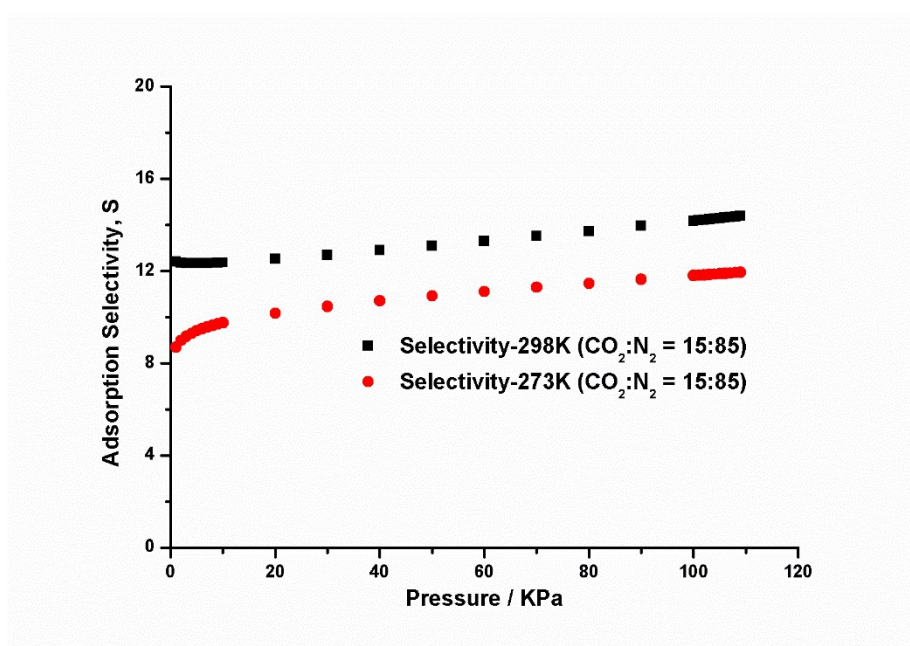

**Figure S6** The CO<sub>2</sub>/N<sub>2</sub> selectivity for of FJI-H20 at 273 K and 298K, respectively.

**Table S4** Hydrogen adsorption data for selected MOFs based on Zn<sub>4</sub>O SBUs.

| MOFs                                                 | H <sub>2</sub> uptake at 77 K <sup>a</sup> per<br>1 atm per wt% | $\Delta H_{ads}$ /Kj<br>mol <sup>-1</sup> | Reference |
|------------------------------------------------------|-----------------------------------------------------------------|-------------------------------------------|-----------|
| FJI-H16, Zn <sub>4</sub> O(dpot)                     | 2.04                                                            | 6.0                                       | this work |
| IR MOF-1(MOF-5), Zn <sub>4</sub> O(bdc) <sub>3</sub> | 1.32                                                            | 4.8                                       | 1a        |

|                                                                                    |      |         |    |
|------------------------------------------------------------------------------------|------|---------|----|
| IR MOF-2, Zn <sub>4</sub> O(bbdc) <sub>3</sub>                                     | 1.21 |         | 1b |
| IR MOF-3, Zn <sub>4</sub> O(abdc) <sub>3</sub>                                     | 1.42 | 6.1     | 1b |
| IR MOF-6, Zn <sub>4</sub> O(cbbdc) <sub>3</sub>                                    | 1.48 |         | 1b |
| IR MOF-8, Zn <sub>4</sub> O(ndc) <sub>3</sub>                                      | 1.5  |         | 1c |
| IR MOF-9, Zn <sub>4</sub> O(bpdc) <sub>3</sub>                                     | 1.17 |         | 1b |
| IR MOF-11, Zn <sub>4</sub> O(hpdc) <sub>3</sub>                                    | 1.62 |         | 1d |
| IR MOF-13, Zn <sub>4</sub> O(pydc) <sub>3</sub>                                    | 1.73 | 5.1-9.1 | 1a |
| IR MOF-18, Zn <sub>4</sub> O(tmbdc) <sub>3</sub>                                   | 0.89 |         | 1b |
| IR MOF-20, Zn <sub>4</sub> O(ttdc) <sub>3</sub>                                    | 1.35 |         | 1d |
| MOF-177, Zn <sub>4</sub> O(btb) <sub>2</sub>                                       | 1.25 | 4.4     | 1a |
| PCN-13, Zn <sub>4</sub> O(adc) <sub>3</sub>                                        | 0.41 |         | 1e |
| Zn <sub>4</sub> O(D <sub>2</sub> -tcppda) <sub>3/2</sub>                           | 0.8  |         | 1f |
| Zn <sub>4</sub> O(ntb) <sub>2</sub>                                                | 1.9  |         | 1g |
| UMCM-2, Zn <sub>4</sub> O(t <sup>2</sup> dc)(btb) <sub>4/3</sub>                   | 1.28 | 6.4     | 1h |
| IRMOF-3-AM5,<br>Zn <sub>4</sub> O(abdc) <sub>0.42</sub> (habdc) <sub>2.58</sub>    | 1.21 | 5.7     | 1i |
| IRMOF-3-AMPh-a,<br>Zn <sub>4</sub> O(abdc) <sub>2.04</sub> (babdc) <sub>0.96</sub> | 1.73 | 5.3     | 1i |
| IRMOF-3-AMPh-b,<br>Zn <sub>4</sub> O(abdc) <sub>1.68</sub> (babdc) <sub>1.32</sub> | 1.73 | 5.7     | 1i |
| IRMOF-3-AMPh-c,<br>Zn <sub>4</sub> O(abdc) <sub>0.9</sub> (babdc) <sub>2.1</sub>   | 1.68 | 6.0     | 1i |
| IRMOF-3-URPh,<br>Zn <sub>4</sub> O(abdc) <sub>1.77</sub> (pubdc) <sub>1.23</sub>   | 1.54 | 5.7     | 1i |
| SNU-77H, Zn <sub>4</sub> O(tcbpa) <sub>2</sub>                                     | 1.79 | 7.05    | 1j |
| MOF-646, Zn <sub>4</sub> O(azd) <sub>3</sub>                                       | 1.75 | 7.8     | 1k |
| FJI-3, Zn <sub>4</sub> O(btc) <sub>2</sub>                                         | 1.26 | 4.62    | 1l |

<sup>a</sup> wt% = 100×(weight of adsorbed H<sub>2</sub>)/(weight of MOF material + weight of adsorbed H<sub>2</sub>).

- 1 (a) J. L. C. Rowsell, A. R. Millward, K. S. Park and O. M. Yaghi, *J. Am. Chem. Soc.*, 2004, **126**, 5666. (b) J. L. C. Rowsell and O. M. Yaghi, *J. Am. Chem. Soc.*, 2006, **128**, 1304; (c) A. Dailly, J. J. Vajo and C. C. Ahn, *J. Phys. Chem. B*, 2006, **110**, 1099; (d) A. G. Wong-Foy, A. J. Matzger and O. M. Yaghi, *J. Am. Chem. Soc.*, 2006, **128**, 3494; (e) S. Q. Ma, X. S. Wang, C. D. Collier, E. S. Manis and H. C. Zhou, *Inorg. Chem.*, 2007, **46**, 8499; (f) D. F. Sun, D. J. Collins, Y. X. Ke, J. L. Zuo and H. C. Zhou, *Chem.–Eur. J.*, 2006, **12**, 3768; (g) E. Y. Lee, S. Y. Jang and M. P. Suh, *J. Am. Chem. Soc.*, 2005, **127**, 6374; (h) K. Koh, A. G. Wong-Foy and A. J. Matzger, *J. Am. Chem. Soc.*, 2009, **131**, 4184; (i) Z. Q. Wang, K. K. Tanabe and S. M. Cohen, *Chem.–Eur. J.*, 2010, **16**, 212; (j) H. J. Park, D.-W. Lim, W. S. Yang, T.-R. Oh, M. P. Suh, *Chem.–Eur. J.*, 2011, **17**, 7251-7260; (k) S. Barman, H. Furukawa, O. Blacque, K. Venkatesan, O. M. Yaghi, H. Berke, *Chem. Commun.*, 2010, **46**, 7981-7983; (l) J. Qian, F. Jiang, L. Zhang, K. Su, J. Pan, Q. Li, D. Yuan, M. Hong, *Chem. Commun.*, 2014, **50**, 1678-1681.
